# Supplementary material for: Synthesis and structure of a novel open-framework zincophosphate with intersecting three-dimensional helical channels
Source: Royal Society of Chemistry journal article supplement (doi:10.1039/b207684p), 2002-01-01
Supplement: b207684p.pdf [file b207684p.pdf]

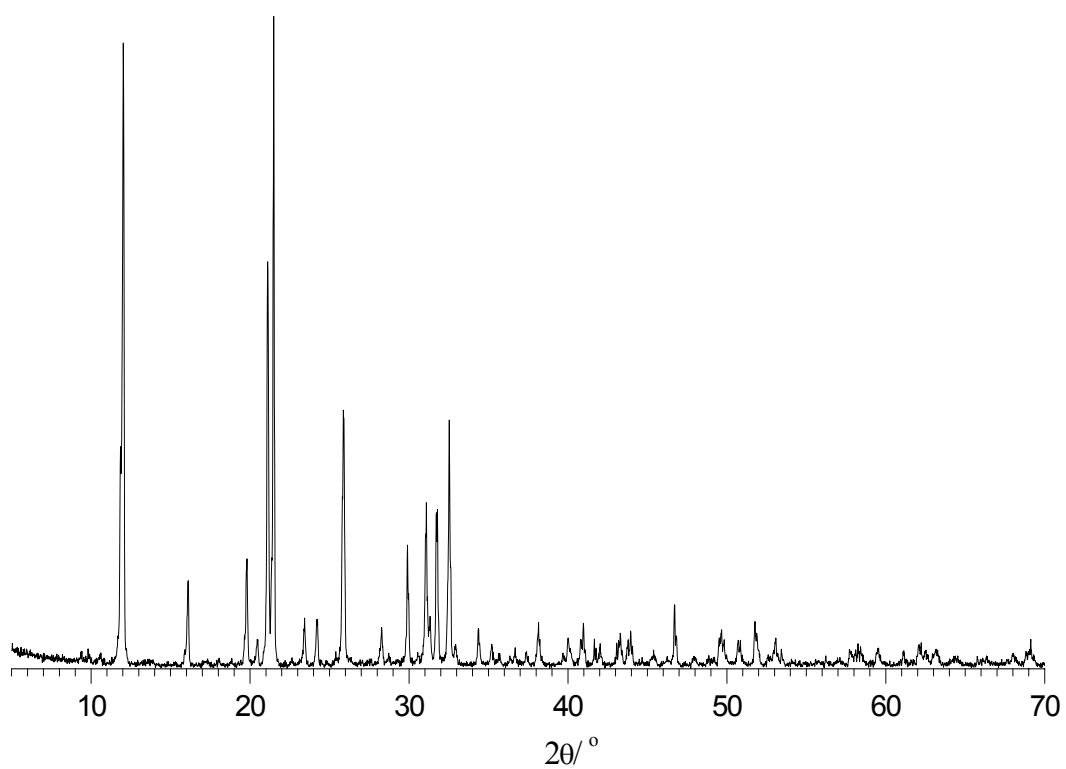

Powder X-ray diffraction pattern of as-synthesized zinc phosphate

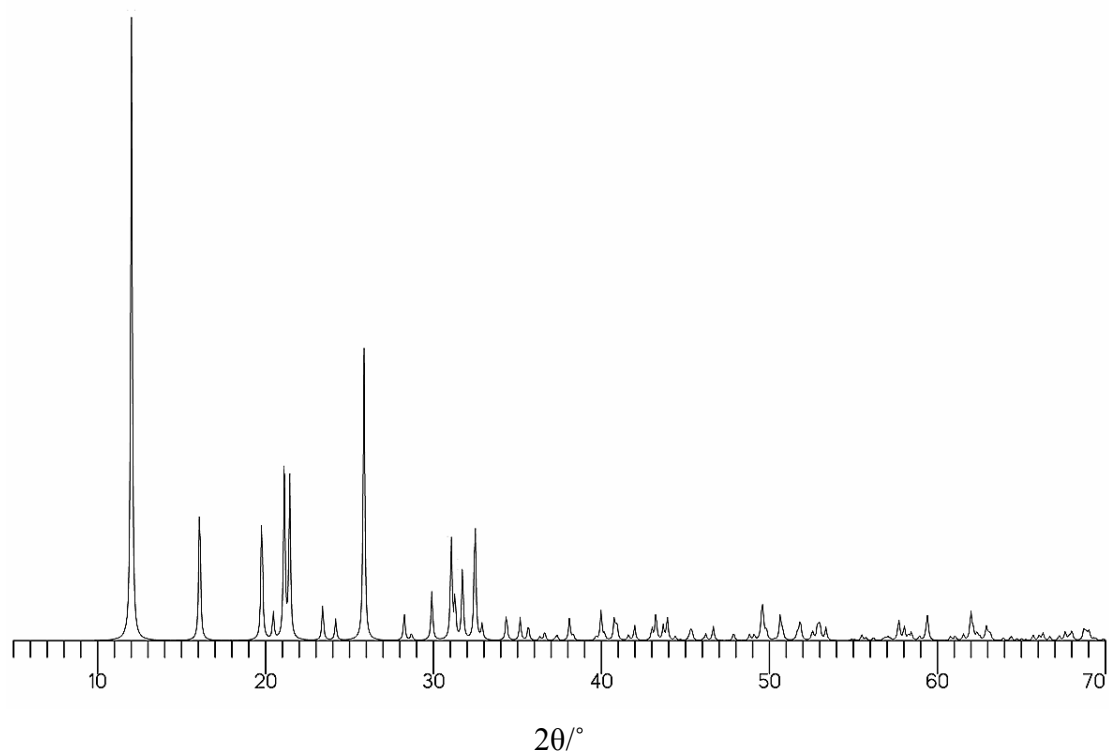

Simulated powder X-ray diffraction pattern based on the single crystal solution
